# Supplementary material for: Comparison of four different synthetic routes of Ni2P/TiO2–Al2O3catalysts for hydrodesulfurization of dibenzothiophene
Source: Royal Society of Chemistry journal article supplement (doi:10.1039/c5ra01899d), 2015-01-01
Supplement: c5ra01899d1.pdf [file c5ra01899d1.pdf]

Supplementary Material to

**Comparison of four different synthetic routes of Ni<sub>2</sub>P/TiO<sub>2</sub>-Al<sub>2</sub>O<sub>3</sub> catalysts for  
hydrodesulfurization of dibenzothiophene**

Ruchao Wei, Qingqing Zhu, Fei Han, Qingxin Guan, Wei Li\*

Key Laboratory of Advanced Energy Materials Chemistry (Ministry of Education), Collaborative

Innovation Center of Chemical Science and Engineering (Tianjin), College of Chemistry,

Nankai University, Tianjin, 300071, China

---

\* Corresponding Author. Tel: +86-22-23508662; fax: +86-22-23508662.  
E-mail address: weili@nankai.edu.cn (W. Li).

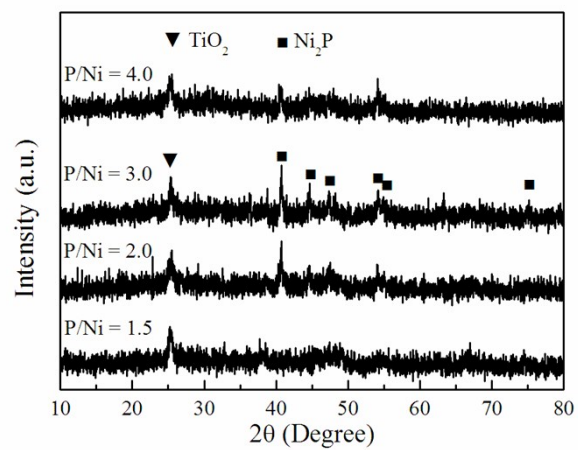

**Fig. S1** XRD patterns of Ni-P/TiO<sub>2</sub>-Al<sub>2</sub>O<sub>3</sub> catalysts with different P/Ni ratios prepared by method II (Ni<sub>2</sub>P loading = 30 wt%).

**Table S1** Textural properties and superficial P/Ni mole ratios of Ni-P/TiO<sub>2</sub>-Al<sub>2</sub>O<sub>3</sub> catalysts prepared by method II (Ni<sub>2</sub>P loading = 30 wt%)

| Catalyst          | S <sub>BET</sub><br>(m <sup>2</sup> /g) | Average<br>pore size<br>(nm) | Pore<br>volume<br>(cm <sup>3</sup> /g) | Superficial atomic ratio<br>P/Ni |
|-------------------|-----------------------------------------|------------------------------|----------------------------------------|----------------------------------|
| Ni-P/Ti/Al-II-1.5 | 31                                      | 3.8                          | 0.05                                   | 2.96                             |
| Ni-P/Ti/Al-II-2.0 | 4                                       | 4.8                          | 0.01                                   | -                                |
| Ni-P/Ti/Al-II-3.0 | 3                                       | 4.8                          | 0.01                                   | 3.18                             |
| Ni-P/Ti/Al-II-4.0 | 2                                       | 4.8                          | 0.01                                   | -                                |

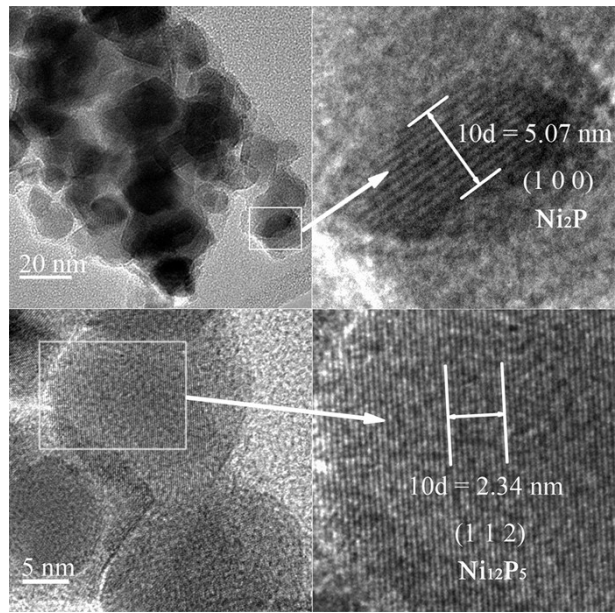

**Fig. S2** High resolution TEM micrographs of the Ni-P/Ti/Al-II-1.5 catalyst.

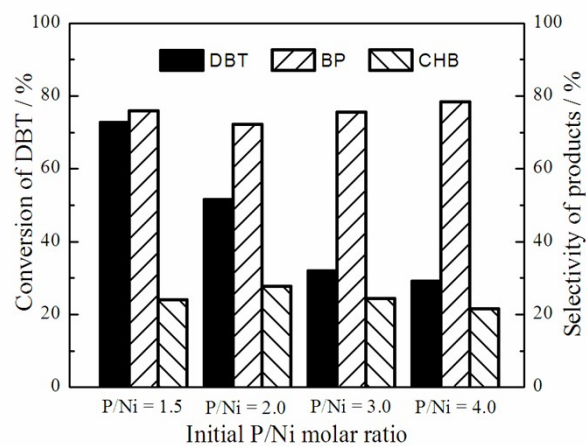

**Fig. S3** HDS performance of Ni-P/TiO<sub>2</sub>-Al<sub>2</sub>O<sub>3</sub> catalysts with different P/Ni mole ratios prepared by method II (Ni<sub>2</sub>P loading = 30 wt%). Reaction conditions: 583 K, 3.0 MPa, WHSV = 6 h<sup>-1</sup>, H<sub>2</sub>/oil = 600/1 (v/v).

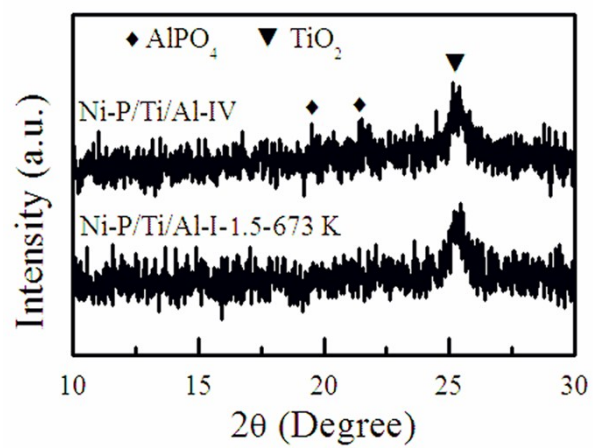

**Fig. S4** Comparison of XRD patterns of the Ni-P/Ti/Al-I-1.5-673 K catalyst and Ni-P/Ti/Al-IV catalyst.

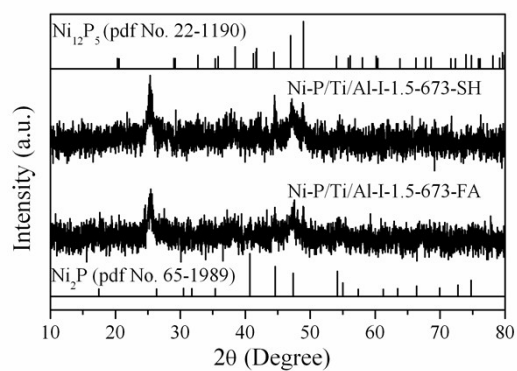

**Fig. S5** XRD patterns of Ni-P/TiO<sub>2</sub>-Al<sub>2</sub>O<sub>3</sub> catalysts prepared using NiCl<sub>2</sub>•6H<sub>2</sub>O and NH<sub>4</sub>H<sub>2</sub>PO<sub>2</sub> as precursor with an initial P/Ni mole ratio of 1.5. Ni-P/Ti/Al-I-1.5-673-SH: prepared in static H<sub>2</sub>, Ni-P/Ti/Al-I-1.5-673-FA: prepared in flowing Ar.

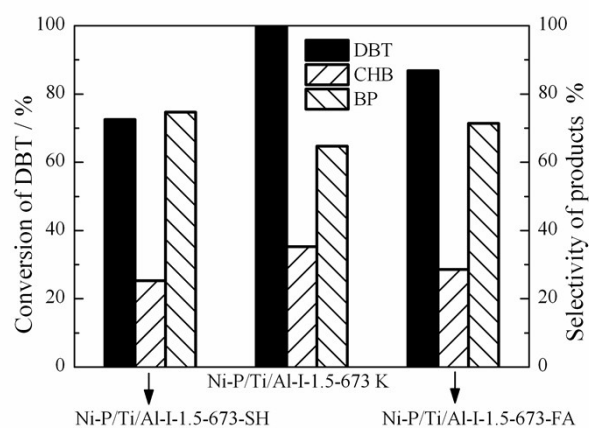

**Fig. S6** Effect of preparation methods on the HDS performance of Ni-P/TiO<sub>2</sub>-Al<sub>2</sub>O<sub>3</sub> catalysts prepared using NiCl<sub>2</sub>•6H<sub>2</sub>O and NH<sub>4</sub>H<sub>2</sub>PO<sub>2</sub> as precursor with an initial P/Ni mole ratio of 1.5. Ni-P/Ti/Al-I-1.5-673-SH: prepared in static H<sub>2</sub>, Ni-P/Ti/Al-I-1.5-673-FA: prepared in flowing Ar. Reaction conditions: 583 K, 3.0 MPa, WHSV = 6 h<sup>-1</sup>, H<sub>2</sub>/oil = 600/1 (v/v).



**Table S2** Effects of Ni-P loadings and supports on the textural properties of various supported Ni-P catalysts prepared by method II (P/Ni mole ratio = 1.5)

| Catalysts                                   | S <sub>BET</sub><br>(m <sup>2</sup> /g) | Average<br>pore<br>size(nm) | Pore<br>volume<br>(cm <sup>3</sup> /g) |
|---------------------------------------------|-----------------------------------------|-----------------------------|----------------------------------------|
| Ni-P/Ti/Al-II-10%                           | 123                                     | 3.8                         | 0.17                                   |
| Ni-P/Ti/Al-II-20%                           | 93                                      | 3.8                         | 0.12                                   |
| Ni-P/Ti/Al-II-30%                           | 31                                      | 3.8                         | 0.05                                   |
| Ni-P/Al <sub>2</sub> O <sub>3</sub> -II-30% | 45                                      | 3.8                         | 0.04                                   |

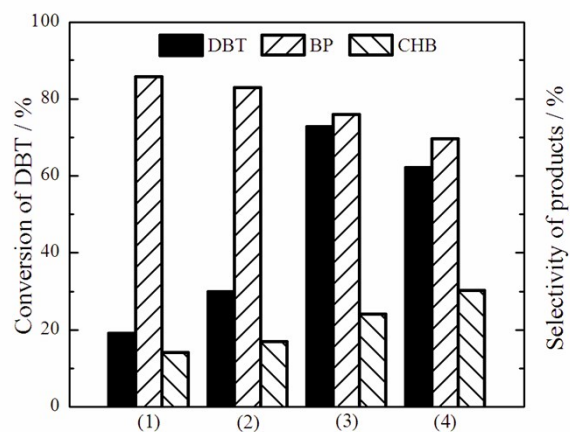

**Fig. S7** HDS performance of various supported nickel phosphide catalysts prepared by method II ( $P/Ni = 1.5$ ): (1) Ni-P/TiO<sub>2</sub>-Al<sub>2</sub>O<sub>3</sub>, 10 wt%; (2) Ni-P/TiO<sub>2</sub>-Al<sub>2</sub>O<sub>3</sub>, 20 wt%; (3) Ni-P/TiO<sub>2</sub>-Al<sub>2</sub>O<sub>3</sub>, 30 wt%; (4) Ni-P/Al<sub>2</sub>O<sub>3</sub>, 30 wt%. Reaction conditions: 583 K, 3.0 MPa, WHSV = 6 h<sup>-1</sup>, H<sub>2</sub>/oil = 600/1 (v/v).
